# Supplementary material
Source: PubMed Central journal article supplement (PMC7203662)
Supplement: NIHMS1576640-supplement-Supplemental_Material.pdf [file NIHMS1576640-supplement-Supplemental_Material.pdf]

## SUPPLEMENTAL MATERIALS

### Targeted inhibition of gut microbial TMAO production reduces renal tubulointerstitial fibrosis and functional impairment in a murine model of chronic kidney disease

Nilaksh Gupta<sup>1,2</sup>, Jennifer A. Buffa<sup>1,2</sup>, Adam B Roberts<sup>1,2</sup>, Naseer Sangwan<sup>1,2</sup>, Sarah M. Skye<sup>1,2</sup>, Lin Li<sup>1,2</sup>, Karen J. Ho<sup>4</sup>, John Varga<sup>5</sup>, Joseph A. DiDonato<sup>1,2</sup>, W.H. Wilson Tang<sup>1,2,3</sup>, Stanley L. Hazen<sup>1,2,3</sup>

Department of <sup>1</sup>Cardiovascular & Metabolic Sciences, Lerner Research Institute; <sup>2</sup>Center for Microbiome & Human Health; and <sup>3</sup>Department of Cardiovascular Medicine, Heart and Vascular Institute; Cleveland Clinic, Cleveland, OH 44195. <sup>4</sup>Division of Vascular Surgery, Northwestern University Feinberg School of Medicine, Chicago, IL. <sup>5</sup>Division of Rheumatology, Northwestern University, Chicago, IL.

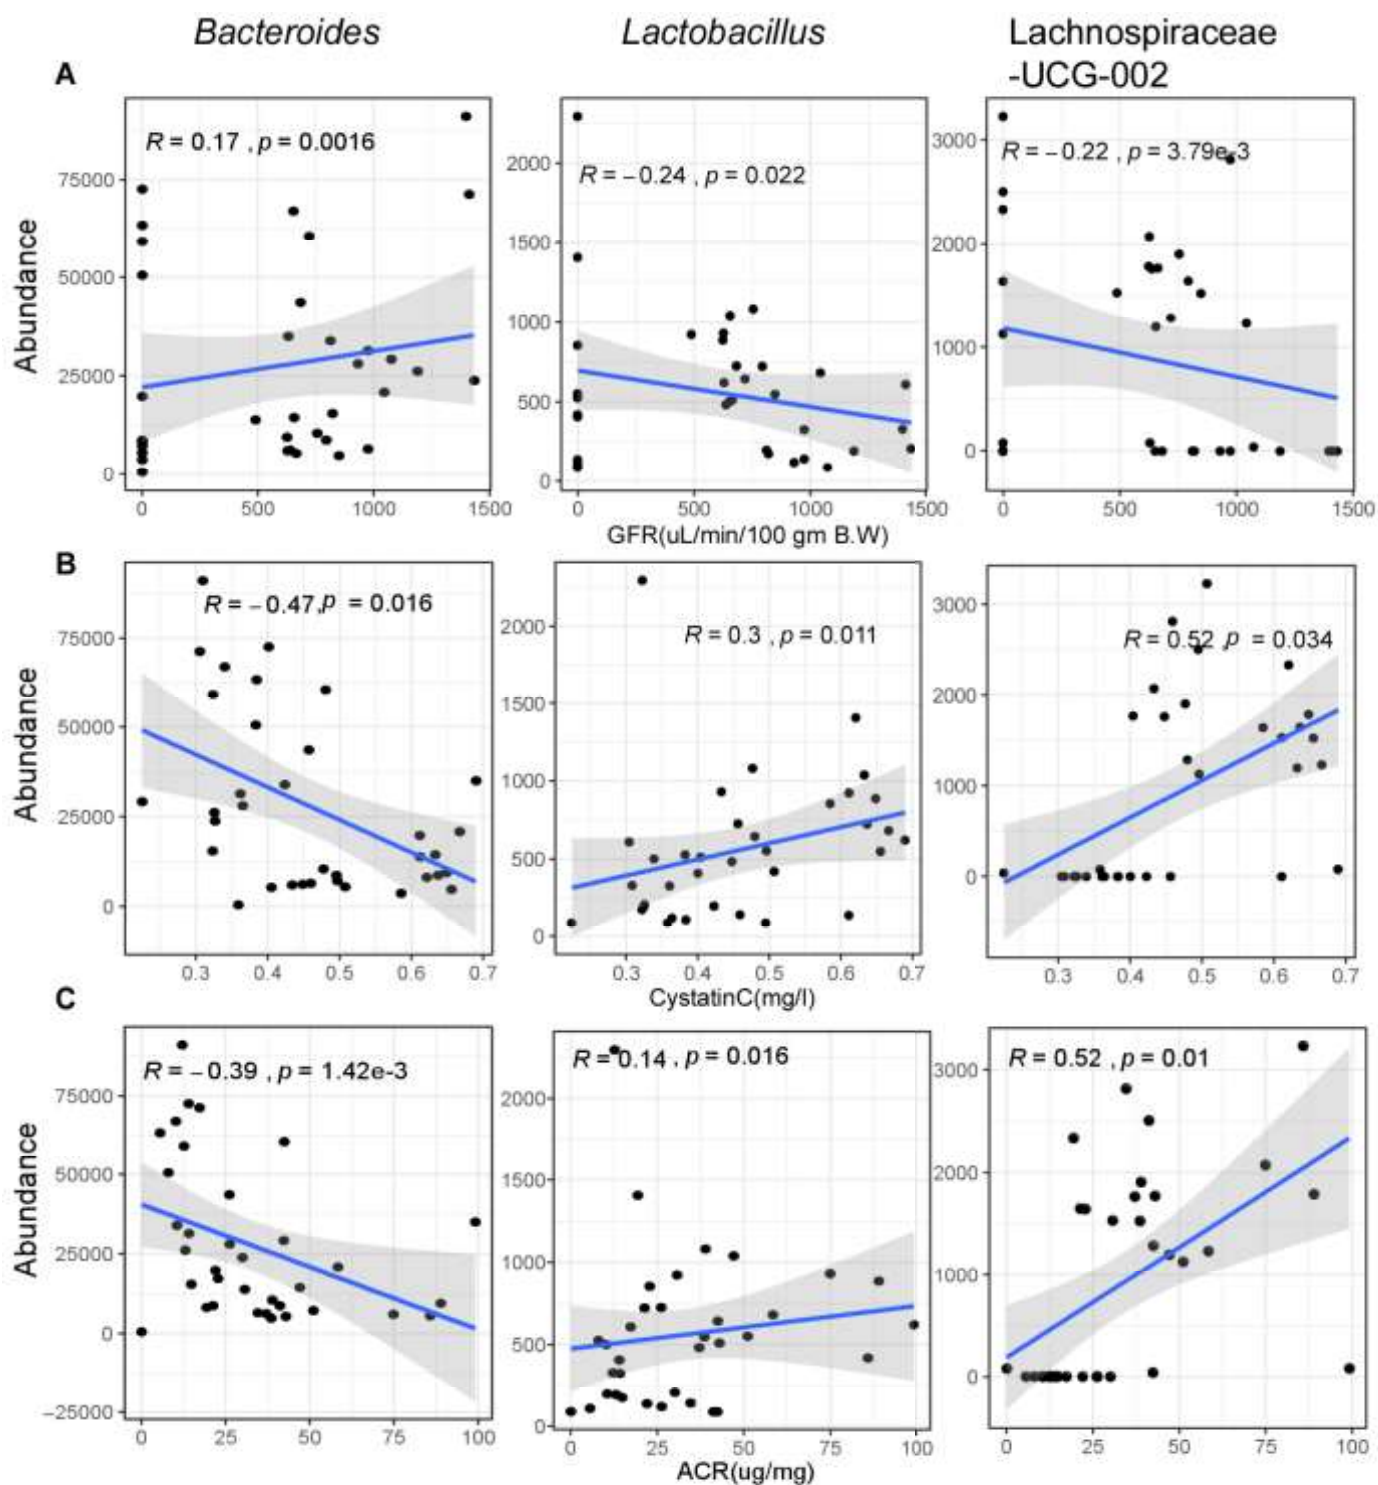

**Supplementary Figure I.** Linear regression based scatter plots showing correlation between abundance of select taxa and renal functional markers. **(A)** GFR( $\mu\text{L}/\text{min}/100 \text{ gm B.W}$ ) **(B)** CystatinC( $\text{mg}/\text{l}$ ) and, **(C)** ACR( $\mu\text{g}/\text{mg}$ ) levels. The  $R^2$  and  $p$ -values are plotted within each panel.

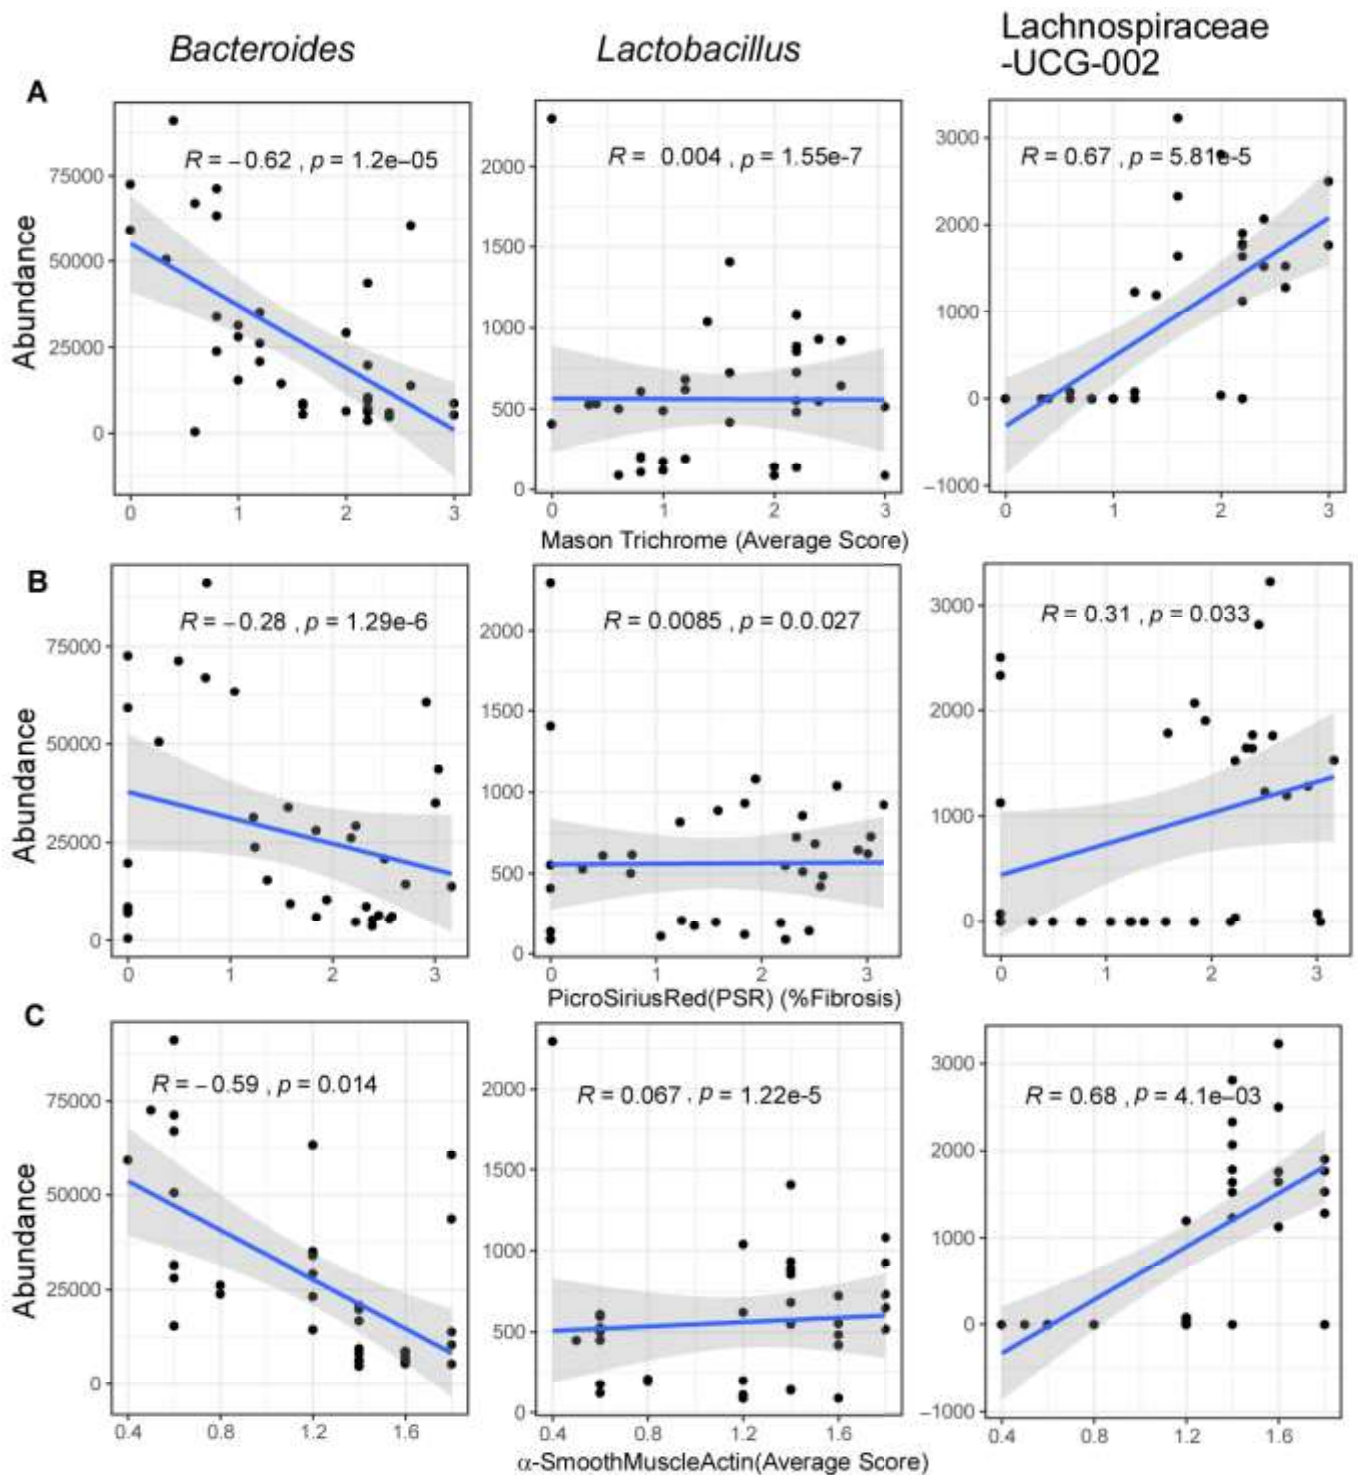

**Supplementary Figure II.** Linear regression based scatter plots showing correlation between abundance of select taxa and renal histologic and immunohistologic measures. **(A)** Mason trichrome **(B)** Picrosirius red and, **(C)**  $\alpha$ -SMA. The  $R^2$  and  $p$ -values are plotted within each panel.

## Major Resources Table

### Animals (in vivo studies)

| Species | Vendor or Source       | Background Strain | Sex   | Persistent ID / URL |
|---------|------------------------|-------------------|-------|---------------------|
| Mouse   | The Jackson Laboratory | C57BL/6J          | Males |                     |

### Reagents

| Name                                         | Vendor or Source         | Catalog # | Working concentration       | Lot # (preferred but not required) | Persistent ID / URL                                                                                                                                                                     |
|----------------------------------------------|--------------------------|-----------|-----------------------------|------------------------------------|-----------------------------------------------------------------------------------------------------------------------------------------------------------------------------------------|
| Picosirius Red (Direct Red 80)               | Sigma                    | 365548    | 0.5gm in 500 ml picric acid |                                    | <a href="https://www.sigmaaldrich.com/catalog/product/sial/365548?lang=en&amp;region=US">https://www.sigmaaldrich.com/catalog/product/sial/365548?lang=en&amp;region=US</a>             |
| Picric Acid (Saturated aqueous solution)     | Sigma                    | P6744     |                             | SHBF8110V                          | <a href="https://www.sigmaaldrich.com/catalog/product/sigma/p6744?lang=en&amp;region=US">https://www.sigmaaldrich.com/catalog/product/sigma/p6744?lang=en&amp;region=US</a>             |
| Mouse/Rat Cystatin C Quantikine ELISA Kit    | R&D                      | MSCTC0    | 1:200 dilution of plasma    | P162717                            | <a href="https://www.rndsystems.com/products/mouse-rat-cystatin-c-quantikine-elisa-kit_msctc0">https://www.rndsystems.com/products/mouse-rat-cystatin-c-quantikine-elisa-kit_msctc0</a> |
| Albuwell M (Mouse Albumin Elisa kit)         | Ethos Biosciences        | 1011      | 1:13 dilution of urine      | 18H16K                             | <a href="https://www.ethosbiosciences.com/collections/albumin/products/albuwell-m">https://www.ethosbiosciences.com/collections/albumin/products/albuwell-m</a>                         |
| (-)-Isoproterenol hydrochloride              | Sigma                    | I6504-1G  | 30mg/kg/day                 | SLBR3848V                          | <a href="https://www.sigmaaldrich.com/catalog/product/sigma/i6504?lang=en&amp;region=US">https://www.sigmaaldrich.com/catalog/product/sigma/i6504?lang=en&amp;region=US</a>             |
| FITC-Sinistrin                               | Medibeacon               | FTC-FS001 | 7.5mg/100gm body weight     | VE17171921                         |                                                                                                                                                                                         |
| RNeasy                                       | Qiagen                   | 74704     |                             | 151017857                          |                                                                                                                                                                                         |
| High-Capacity cDNA Reverse Transcription Kit | Thermo Fisher Scientific | 4368814   |                             | 005144386                          | <a href="https://www.thermofisher.com/order/catalog/product/4368814#/4368814">https://www.thermofisher.com/order/catalog/product/4368814#/4368814</a>                                   |
| Osmotic Pumps                                | Alzet                    | 1004      |                             | 10382-17                           |                                                                                                                                                                                         |
| TaqMan Fast Universal PCR Master             | Thermo Fisher Scientific | 4352042   |                             | 00730474                           | <a href="https://www.thermofisher.com/order/catalog/product/">https://www.thermofisher.com/order/catalog/product/</a>                                                                   |

|                                                                 |                                           |             |                           |        |                                                                                                                                                         |
|-----------------------------------------------------------------|-------------------------------------------|-------------|---------------------------|--------|---------------------------------------------------------------------------------------------------------------------------------------------------------|
| Mix (2X), no AmpErase UNG                                       |                                           |             |                           |        | 4352042?SID=srch-hj-4352042#/4352042?SID=srch-hj-4352042                                                                                                |
| Anti-alpha smooth muscle Actin antibody                         | Abcam                                     | Ab5694      | 0.4µg/ml (1:500 dilution) | 825197 | <a href="https://www.abcam.com/alpha-smooth-muscle-actin-antibody-ab5694.html">https://www.abcam.com/alpha-smooth-muscle-actin-antibody-ab5694.html</a> |
| Biotin-SP (long spacer) AffiniPure Donkey Anti-Rabbit IgG (H+L) | Jackson ImmunoResearch Laboratories, Inc. | 711-065-152 | 4µg/ml (1:250 dilution)   |        | <a href="https://www.jacksonimmuno.com/catalog/products/711-065-152">https://www.jacksonimmuno.com/catalog/products/711-065-152</a>                     |

### TaqManPrimers

| Name      | Catalog#      | Source                   | Persistent ID / URL                                                                                                                                                                                                                                                                               |
|-----------|---------------|--------------------------|---------------------------------------------------------------------------------------------------------------------------------------------------------------------------------------------------------------------------------------------------------------------------------------------------|
| GAPDH     | Mm99999915_g1 | Thermo Fisher Scientific | <a href="https://www.thermofisher.com/order/genome-database/?pearUXVerSuffix=pearUX2&amp;elcanoForm=true#!/ge/assays/ge_all/?keyword=mm99999915_g1">https://www.thermofisher.com/order/genome-database/?pearUXVerSuffix=pearUX2&amp;elcanoForm=true#!/ge/assays/ge_all/?keyword=mm99999915_g1</a> |
| TGF-beta  | Mm01227699_m1 | Thermo Fisher Scientific | <a href="https://www.thermofisher.com/order/genome-database/?pearUXVerSuffix=pearUX2&amp;elcanoForm=true#!/ge/assays/ge_all/?keyword=Mm01227699_m1">https://www.thermofisher.com/order/genome-database/?pearUXVerSuffix=pearUX2&amp;elcanoForm=true#!/ge/assays/ge_all/?keyword=Mm01227699_m1</a> |
| Col1a1    | Mm00801666_g1 | Thermo Fisher Scientific | <a href="https://www.thermofisher.com/order/genome-database/?pearUXVerSuffix=pearUX2&amp;elcanoForm=true#!/ge/assays/ge_all/?keyword=Mm00801666_g1">https://www.thermofisher.com/order/genome-database/?pearUXVerSuffix=pearUX2&amp;elcanoForm=true#!/ge/assays/ge_all/?keyword=Mm00801666_g1</a> |
| TIMP1     | Mm01341361_m1 | Thermo Fisher Scientific | <a href="https://www.thermofisher.com/order/genome-database/?pearUXVerSuffix=pearUX2&amp;elcanoForm=true#!/ge/assays/ge_all/?keyword=Mm01341361_m1">https://www.thermofisher.com/order/genome-database/?pearUXVerSuffix=pearUX2&amp;elcanoForm=true#!/ge/assays/ge_all/?keyword=Mm01341361_m1</a> |
| Alpha-SMA | Mm00725412_s1 | Thermo Fisher Scientific | <a href="https://www.thermofisher.com/order/genome-database/?pearUXVerSuffix=pearUX2&amp;elcanoForm=true#!/ge/assays/ge_all/?keyword=Mm00725412_s1">https://www.thermofisher.com/order/genome-database/?pearUXVerSuffix=pearUX2&amp;elcanoForm=true#!/ge/assays/ge_all/?keyword=Mm00725412_s1</a> |

### Experimental Diets

| Diet                                 | Vendor | Persistent ID / URL |
|--------------------------------------|--------|---------------------|
| Control Diet (0.08gm% total choline) | Envigo | TD.130104           |
| 1.2% Choline Chloride                | Envigo | TD.09041            |
| 0.3% TMAO                            | Envigo | TD.07865            |
| Choline diet +0.06gm% IMC            | Envigo | TD.150812           |
